# Supplementary material for: One-step radiation-induced construction of multi-responsive self-assemblies using simple cyclic ethers
Source: Royal Society of Chemistry journal article supplement (doi:10.1039/c3sm50327e), 2013-01-01
Supplement: c3sm50327e.pdf [file c3sm50327e.pdf]

Supplementary Material (ESI) for Soft Matter

**One-step radiation-induced construction of multi-responsive  
self-assemblies using simple cyclic ethers †**

Chuhong Yu,<sup>a</sup> Li Zhao,<sup>b</sup> Shuojue Wang,<sup>a</sup> Zhenpeng Cui,<sup>a</sup> Jing Peng\*,<sup>a</sup> Jiuqiang Li,<sup>a</sup>  
Maolin Zhai\*<sup>a</sup> and Jianbin Huang\*<sup>b</sup>

<sup>a</sup> *Beijing National Laboratory for Molecular Sciences (BNLMS), Department of Applied Chemistry and the Key Laboratory of Polymer Chemistry and Physics of the Ministry of Education, College of Chemistry and Molecular Engineering, Peking University, Beijing 100871, P. R. China*

<sup>b</sup> *Beijing National Laboratory for Molecular Sciences (BNLMS), State Key Laboratory of Structural Chemistry of Unstable and Stable Species, College of Chemistry and Molecular Engineering, Peking University, Beijing 100871, P. R. China*

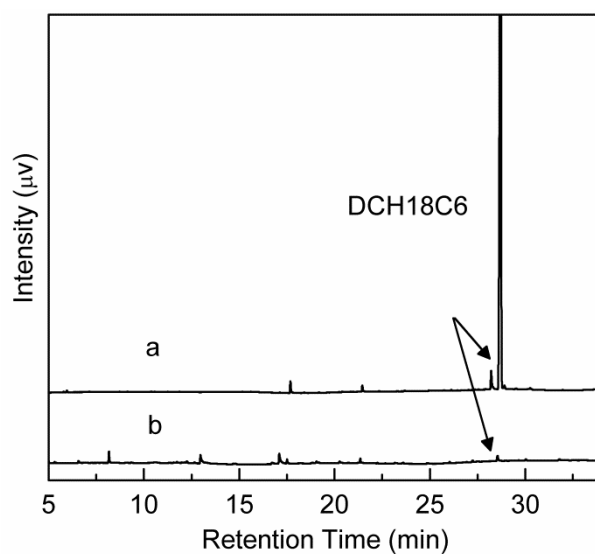

**Fig. S1** GC spectra for the DCH18C6 aqueous solution before and after 55.6 h irradiation: a. the 0.01 M DCH18C6 aqueous solution without irradiation, b. the 0.01 M DCH18C6 aqueous solution after 55.6 h irradiation.

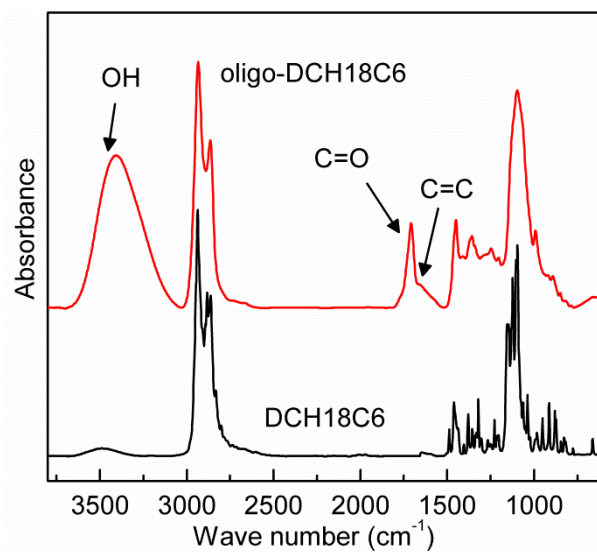

**Fig. S2** Micro-FTIR spectra for the oligo-DCH18C6 and DCH18C6

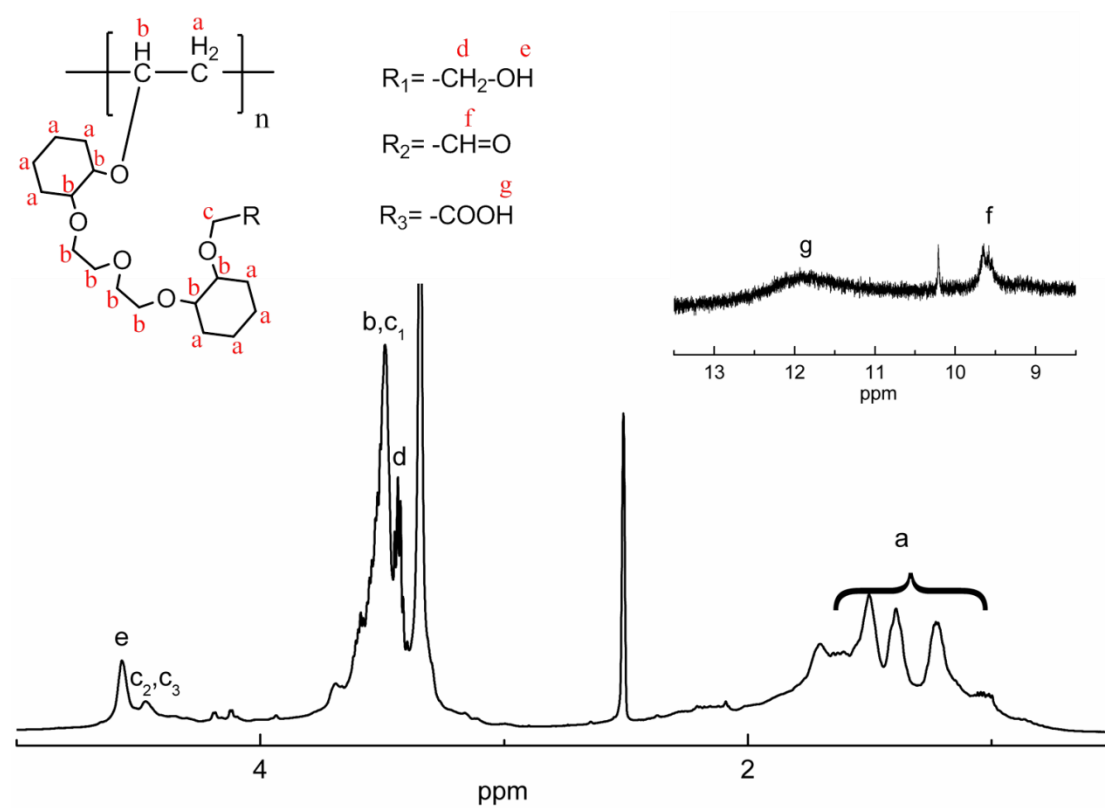

**Fig. S3**  $^1\text{H}$  NMR spectra for oligo-DCH18C6. The inset is  $^1\text{H}$  NMR spectra in the range of 8.5-13.5 ppm.

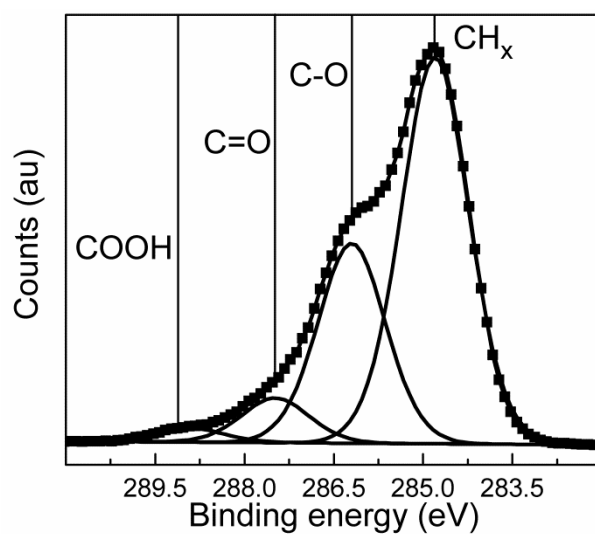

**Fig. S4** XPS spectra for the oligo-DCH18C6 obtained by irradiating 0.01 M DCH18C6 aqueous solution for 55.6 h

**Table S1** The content of functional groups in oligo-DCH18C6 determined by XPS.

| Samples       | Content of functional groups in the<br>oligomers (%) |       |      |      |
|---------------|------------------------------------------------------|-------|------|------|
|               | C-H <sub>x</sub>                                     | C-O   | C=O  | COOH |
| oligo-DCH18C6 | 45.61                                                | 29.22 | 4.31 | 0.96 |

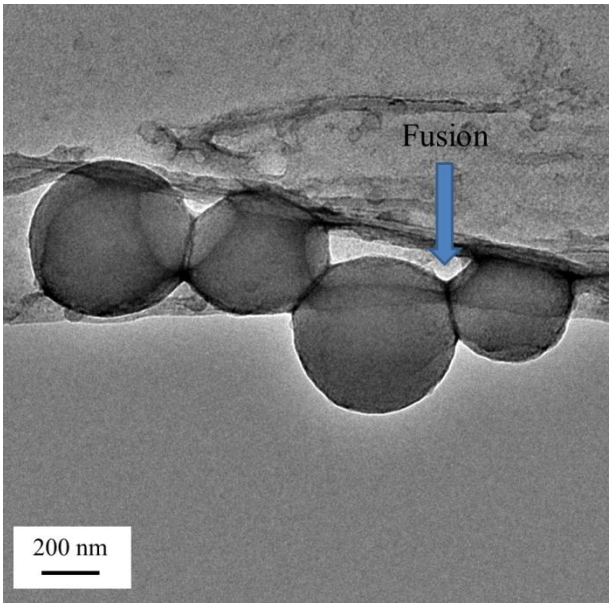

**Fig. S5** TEM images of the core-shell micelles of oligo-DCH18C6 at 38 °C in water

**Table S2** Average Sr-O coordination number derived from EXAFS measurements.

| Sample <sup>a</sup>                                                                       | $N_0$ | Sr-O distance (Å) | $\sigma^2$ | Irradiation time (h) |
|-------------------------------------------------------------------------------------------|-------|-------------------|------------|----------------------|
| DCH18C6/Sr(NO <sub>3</sub> ) <sub>2</sub>                                                 | 9.7   | 2.60              | 0.01738    | 0                    |
| DCH18C6/Sr(NO <sub>3</sub> ) <sub>2</sub>                                                 | 6.6   | 2.57              | 0.00935    | 277.8                |
| <sup>a</sup> DCH18C6 (0.005M)/Sr(NO <sub>3</sub> ) <sub>2</sub> (0.005M) aqueous solution |       |                   |            |                      |
